# Supplementary material
Source: publisher site journal article supplement (https://www.dovepress.com/article/273422)
Supplement: Supplementary file 1 [file get_supplementary_file.php]

Supplementary Table 1 Diagnosis of ACOS (Based on GINA/GOLD joint document)1

| Features :  if present suggest | ASTHMA | COPD |
| --- | --- | --- |
| Age of onset | Before age 20 years | After age 40 years |
| Pattern of symptoms | Variation over minutes, hours or days  Worse during the night or early morning  Triggered by exercise, emotions including laughter, dust or exposure to allergens | Persistent despite treatment  Good and bad days but always daily symptoms and exertional dyspnea  Chronic cough and sputum preceded onset of dyspnea, unrelated to triggers |
| Lung function | Record of variable airflow limitation  (spirometry or peak flow) | Record of persistent airflow limitation (FEV1/FVC<0.7, post-BD) |
| Lung function  between symptoms | Normal | Abnormal |
| Past history or  family history | Previous doctor diagnosis of asthma  Family history of asthma, and other allergic conditions (allergic rhinitis or eczema) | Previous doctor diagnosis of COPD, chronic  bronchitis or emphysema  Heavy exposure to risk factor :tobacco smoke，biomass fuels |
| Time course | No worsening of symptoms over time. Variation in symptoms either seasonally, or from year to year  May improve spontaneously or have an immediate response to bronchodilators or to ICS over weeks | Symptoms slowly worsening over time (progressive course over years)  Rapid-acting bronchodilator treatment provides only limited relief |
| Chest X-ray | Normal | Severe hyperinflation |

NOTE: these features, if present, best distinguish between asthma and COPD. Several positive features (3 or more) for either asthma or COPD suggest that diagnosis. If there are a similar number for both asthma and COPD, consider diagnosis of ACOS.

1. Global Initiative for Asthma, Global Initiative for Chronic Obstructive Lung Disease, Diagnosis of Disease of Chronic Airflow Limitation: Asthma, COPD, and Asthma–COPD Overlap Syndrome (ACOS) updated 2015. Available from: http://www.ginasthma. org/ or http://goldcopd.org.
